# Supplementary material
Source: MDPI journal article supplement (https://www.mdpi.com/2039-7283/14/2/44)
Supplement: s1 [file s1]

**Table S1.** Coding detail.

| Comorbidity                         | ICD-9                                                                                                                                | ICD10                                                                                                                                     |
|-------------------------------------|--------------------------------------------------------------------------------------------------------------------------------------|-------------------------------------------------------------------------------------------------------------------------------------------|
| Myocardial Infarction               | 410.x, 412.x                                                                                                                         | I21.x, I22.x, I25.2                                                                                                                       |
| Congestive Heart Failure            | 398.91, 402.01, 402.11, 402.91, 404.01, 404.03, 404.11, 404.13, 404.91, 404.93, 425.4-425.9, 428.x                                   | I09.9, I11.0, I13.0, I13.2, I25.5, I42.0, I42.5-I42.9, I43.x, I50.x, P29.0                                                                |
| Peripheral Vascular Disease         | 093.0, 437.3, 440.x, 441.x, 443.1-443.9, 47.1, 557.1, 557.9, V43.4                                                                   | I70.x, I71.x, I73.1, I73.8, I73.9, I771, I79.0, I79.2, K55.1, K55.8, K55.9, Z95.8, Z95.9                                                  |
| Cerebrovascular Disease             | 362.34, 430.x-438.x                                                                                                                  | G45.x, G46.x, H34.0, T60.x-I69.x                                                                                                          |
| Dementia                            | 290.x, 294.1, 331.2                                                                                                                  | F00.x-F03.x, F05.1, G30.x, G31.1                                                                                                          |
| Chronic Pulmonary Disease           | 416.8, 416.9, 490.x-505.x, 506.4, 508.1, 508.8                                                                                       | I27.8, I27.9, J40.x-J47.x, J60.x-J67.x, J68.4, J70.1, J70.3                                                                               |
| Rheumatic Disease                   | 446.5, 710.0-710.4, 714.0-714.2, 714.8, 725.x                                                                                        | M05.x, M06.x, M31.5, M32.x-M34.x, M35.a, M35.3, M36.0                                                                                     |
| Peptic Ulcer Disease                | 531.x-534.x                                                                                                                          | K25.x-K28.x                                                                                                                               |
| Mild Liver Disease                  | 070.22, 070.23, 070.32, 070.33, 070.44, 070.54, 070.6, 070.9, 570.x, 571.x, 573.3, 573.4, 573.8, 573.9, V42.7                        | B18.x, K70.0-K70.3, K70.9, K71.3-K71.5, K71.7, K73.x, K74.x, K76.0, K76.2-K76.4, K76.8, K76.9, Z94.4                                      |
| Diabetes without complications      | 250.0-250.3, 250.8, 250.9                                                                                                            | E10.0, E10.1, E10.6, E10.8, E10.9, E11.0, E11.1, E11.6, E11.8, E11.9, E12.0, E12.1, E126, E12.8, E12.9, E14.0, E14.1, E14.6, E14.8, E14.9 |
| Diabetes with chronic complications | 250.4-250.7                                                                                                                          | E10.2-E10.5, E10.7, E11.2-E11.5, E11.7, E12.2-E12.5, E12.7, E13.2-E13.5, E13.7, E14.2-E14.5, E14.7                                        |
| Paraplegia and Hemiplegia           | 334.1, 342.x, 343.x, 344.0-344.6, 344.9                                                                                              | G04.1, G11.4, G80.1, G80.2, G81.x, G82.x, G83.0-G83.4, G83.9                                                                              |
| Renal Disease                       | 403.01, 403.11, 403.91, 404.02, 404.03, 404.12, 404.13, 404.92, 404.93, 582.x, 583.0-583.7, 585.x, 586.x, 588.0, V42.0, V45.1, V56.x | I12.0, I13.1, N03.2-N03.7, N05.2-N05.7, N18.x, N19.x, N25.0, Z49.0-Z49.2, Z94.0, Z99.2                                                    |
| Cancer                              | 140.x-172.x, 174.x-195.8, 200.x-208.x, 238.6                                                                                         | C00.x-C26.x, C30.x-C34.x, C37.x-C41.x, C43.x, C45.x-C58.x, C60.x-C76.x, C81.x-C85.x, C88.x, C90.x-C97.x                                   |
| Moderate or Severe Liver Disease    | 456.0-456.2, 572.2-572.8                                                                                                             | I85.0, I85.9, I86.4, I98.2, K70.4, K71.1, K72.1, K72.9, K76.5, K76.6, K76.7                                                               |
| Metastatic Carcinoma                | 196.x-199.x                                                                                                                          | C77.x-C80.x                                                                                                                               |
| AIDS/HIV                            | 042.x-044.x                                                                                                                          | B20.x-B22.x, B24.x                                                                                                                        |
